# Supplementary material
Source: publisher figshare collection journal article supplement (https://gsapubs.figshare.com/articles/dataset/_/12114525)
Supplement: Supplementary file 1 [file 2]

## Sheet: PlotDat1
Source sheet	20130331	30	0	35	0	30	0
Plot name	ProbDens1	30.075	0	37.5	0	179.925	0
Plot Type	16	30.15	0	37.5	1
1st free col	9	30.225	0	35	1
Sigma Level	1	30.3	0	35	0
Absolute Errs	TRUE	30.375	0	ErrBox	ErrBox
Symbol Type	1	30.45	0	37.5	0
Inverse Plot	FALSE	30.525	0	40	0
Color Plot	TRUE	30.6	0	40	1
3D plot	FALSE	30.675	0	37.5	1
Linear	FALSE	30.75	0	37.5	0
Data Range	I110:J121,I4:J90	30.825	0	ErrBox	ErrBox
Filled Symbols	FALSE	30.9	0	40	0
ConcAge	FALSE	30.975	0	42.5	0
ConcSwap	FALSE	31.05	0	42.5	1
1st Symbol-row	1	31.125	0	40	1
		31.2	0	40	0
		31.275	0	ErrBox	ErrBox
		31.35	0	45	0
		31.425	0	47.5	0
		31.5	0	47.5	3
		31.575	0	45	3
		31.65	0	45	0
		31.725	0	ErrBox	ErrBox
		31.8	0	47.5	0
		31.875	0	50	0
		31.95	0	50	2
		32.025	0	47.5	2
		32.1	0	47.5	0
		32.175	0	ErrBox	ErrBox
		32.25	0	50	0
		32.325	0	52.5	0
		32.4	1.08304e-08	52.5	8
		32.475	2.33619e-08	50	8
		32.55	4.9272e-08	50	0
		32.625	1.01606e-07	ErrBox	ErrBox
		32.7	2.04866e-07	52.5	0
		32.775	4.03875e-07	55	0
		32.85	7.78489e-07	55	4
		32.925	1.46719e-06	52.5	4
		33	2.70364e-06	52.5	0
		33.075	4.87125e-06	ErrBox	ErrBox
		33.15	8.58143e-06	55	0
		33.225	1.47811e-05	57.5	0
		33.3	2.48933e-05	57.5	2
		33.375	4.09909e-05	55	2
		33.45	6.59964e-05	55	0
		33.525	0.000103892	ErrBox	ErrBox
		33.6	0.000159908	57.5	0
		33.675	0.000240652	60	0
		33.75	0.000354107	60	1
		33.825	0.000509459	57.5	1
		33.9	0.000716659	57.5	0
		33.975	0.000985698	ErrBox	ErrBox
		34.05	0.00132557	60	0
		34.125	0.00174298	62.5	0
		34.2	0.00224083	62.5	3
		34.275	0.00281678	60	3
		34.35	0.00346199	60	0
		34.425	0.00416033	ErrBox	ErrBox
		34.5	0.0048883	62.5	0
		34.575	0.00561586	65	0
		34.65	0.00630816	65	7
		34.725	0.00692816	62.5	7
		34.8	0.00743981	62.5	0
		34.875	0.00781148	ErrBox	ErrBox
		34.95	0.00801925	65	0
		35.025	0.00804938	67.5	0
		35.1	0.00789986	67.5	3
		35.175	0.00758062	65	3
		35.25	0.00711244	65	0
		35.325	0.0065247	ErrBox	ErrBox
		35.4	0.00585236	75	0
		35.475	0.00513251	77.5	0
		35.55	0.00440106	77.5	1
		35.625	0.00368988	75	1
		35.7	0.0030248	75	0
		35.775	0.00242443	ErrBox	ErrBox
		35.85	0.00189998	77.5	0
		35.925	0.00145586	80	0
		36	0.00109073	80	1
		36.075	0.000798991	77.5	1
		36.15	0.000572264	77.5	0
		36.225	0.000400755	ErrBox	ErrBox
		36.3	0.000274404	80	0
		36.375	0.000183708	82.5	0
		36.45	0.000120253	82.5	5
		36.525	7.69649e-05	80	5
		36.6	4.81634e-05	80	0
		36.675	2.94693e-05	ErrBox	ErrBox
		36.75	1.763e-05	82.5	0
		36.825	1.03124e-05	85	0
		36.9	5.90835e-06	85	3
		36.975	3.32553e-06	82.5	3
		37.05	1.87286e-06	82.5	0
		37.125	1.13459e-06	ErrBox	ErrBox
		37.2	9.07519e-07	85	0
		37.275	1.17964e-06	87.5	0
		37.35	2.16253e-06	87.5	17
		37.425	4.39384e-06	85	17
		37.5	8.93397e-06	85	0
		37.575	1.76871e-05	ErrBox	ErrBox
		37.65	3.38667e-05	87.5	0
		37.725	6.26564e-05	90	0
		37.8	0.000111915	90	12
		37.875	0.000192995	87.5	12
		37.95	0.000321318	87.5	0
		38.025	0.000516494	ErrBox	ErrBox
		38.1	0.000801522	90	0
		38.175	0.00120088	92.5	0
		38.25	0.00173705	92.5	10
		38.325	0.00242583	90	10
		38.4	0.00327069	90	0
		38.475	0.00425746	ErrBox	ErrBox
		38.55	0.00535049	92.5	0
		38.625	0.00649186	95	0
		38.7	0.0076046	95	3
		38.775	0.00860034	92.5	3
		38.85	0.00939047	92.5	0
		38.925	0.00989901	ErrBox	ErrBox
		39	0.0100746	95	0
		39.075	0.00989918	97.5	0
		39.15	0.00939084	97.5	1
		39.225	0.00860093	95	1
		39.3	0.00760548	95	0
		39.375	0.00649314	ErrBox	ErrBox
		39.45	0.00535234	102.5	0
		39.525	0.00426015	105	0
		39.6	0.00327461	105	1
		39.675	0.00243158	102.5	1
		39.75	0.00174554	102.5	0
		39.825	0.00121341	ErrBox	ErrBox
		39.9	0.00082003	105	0
		39.975	0.000543715	107.5	0
		40.05	0.000361118	107.5	2
		40.125	0.00025069	105	2
		40.2	0.000194737	105	0
		40.275	0.000180236	ErrBox	ErrBox
		40.35	0.000198779	107.5	0
		40.425	0.000246012	110	0
		40.5	0.000320827	110	2
		40.575	0.000424535	107.5	2
		40.65	0.000560076	107.5	0
		40.725	0.00073131	ErrBox	ErrBox
		40.8	0.000942359	110	0
		40.875	0.00119699	112.5	0
		40.95	0.00149803	112.5	1
		41.025	0.00184677	110	1
		41.1	0.00224243	110	0
		41.175	0.0026817	ErrBox	ErrBox
		41.25	0.00315846	112.5	0
		41.325	0.00366358	115	0
		41.4	0.00418502	115	1
		41.475	0.00470823	112.5	1
		41.55	0.0052167	112.5	0
		41.625	0.00569283	ErrBox	ErrBox
		41.7	0.00611899	140	0
		41.775	0.00647866	142.5	0
		41.85	0.00675756	142.5	1
		41.925	0.00694469	140	1
		42	0.00703323	140	0
		42.075	0.00702098	ErrBox	ErrBox
		42.15	0.00691065	160	0
		42.225	0.00670957	162.5	0
		42.3	0.00642924	162.5	1
		42.375	0.00608441	160	1
		42.45	0.00569209	160	0
		42.525	0.00527034	ErrBox	ErrBox
		42.6	0.00483719	162.5	0
		42.675	0.00440953	165	0
		42.75	0.00400228	165	1
		42.825	0.00362778	162.5	1
		42.9	0.00329543	162.5	0
		42.975	0.0030116	ErrBox	ErrBox
		43.05	0.00277973
		43.125	0.00260069
		43.2	0.00247319
		43.275	0.00239424
		43.35	0.00235972
		43.425	0.00236478
		43.5	0.00240427
		43.575	0.00247307
		43.65	0.00256629
		43.725	0.00267947
		43.8	0.00280861
		43.875	0.00295023
		43.95	0.00310134
		44.025	0.00325937
		44.1	0.00342214
		44.175	0.0035878
		44.25	0.00375477
		44.325	0.00392167
		44.4	0.00408732
		44.475	0.00425073
		44.55	0.004411
		44.625	0.00456745
		44.7	0.00471956
		44.775	0.00486701
		44.85	0.0050097
		44.925	0.00514782
		45	0.00528186
		45.075	0.00541255
		45.15	0.00554103
		45.225	0.00566878
		45.3	0.00579756
		45.375	0.00592942
		45.45	0.00606664
		45.525	0.00621156
		45.6	0.00636653
		45.675	0.00653372
		45.75	0.00671494
		45.825	0.00691148
		45.9	0.00712391
		45.975	0.00735196
		46.05	0.00759439
		46.125	0.00784898
		46.2	0.00811258
		46.275	0.00838129
		46.35	0.00865075
		46.425	0.00891654
		46.5	0.00917472
		46.575	0.00942237
		46.65	0.00965814
		46.725	0.00988286
		46.8	0.0100997
		46.875	0.0103145
		46.95	0.0105352
		47.025	0.010771
		47.1	0.011032
		47.175	0.0113267
		47.25	0.0116613
		47.325	0.0120374
		47.4	0.012451
		47.475	0.0128916
		47.55	0.0133423
		47.625	0.0137806
		47.7	0.0141804
		47.775	0.0145145
		47.85	0.0147575
		47.925	0.0148892
		48	0.0148973
		48.075	0.0147786
		48.15	0.0145406
		48.225	0.0142003
		48.3	0.0137827
		48.375	0.0133184
		48.45	0.0128403
		48.525	0.0123806
		48.6	0.011968
		48.675	0.0116255
		48.75	0.0113695
		48.825	0.0112093
		48.9	0.0111475
		48.975	0.0111813
		49.05	0.0113035
		49.125	0.0115045
		49.2	0.0117733
		49.275	0.0120991
		49.35	0.0124717
		49.425	0.012882
		49.5	0.0133229
		49.575	0.0137884
		49.65	0.0142741
		49.725	0.0147765
		49.8	0.0152933
		49.875	0.0158224
		49.95	0.0163622
		50.025	0.0169115
		50.1	0.0174688
		50.175	0.0180332
		50.25	0.0186037
		50.325	0.0191795
		50.4	0.0197601
		50.475	0.0203455
		50.55	0.0209358
		50.625	0.0215316
		50.7	0.0221338
		50.775	0.0227431
		50.85	0.0233604
		50.925	0.0239855
		51	0.0246178
		51.075	0.0252549
		51.15	0.025893
		51.225	0.0265258
		51.3	0.0271454
		51.375	0.0277412
		51.45	0.028301
		51.525	0.0288111
		51.6	0.0292572
		51.675	0.0296252
		51.75	0.029902
		51.825	0.0300769
		51.9	0.0301422
		51.975	0.0300939
		52.05	0.0299323
		52.125	0.0296619
		52.2	0.0292915
		52.275	0.0288333
		52.35	0.0283021
		52.425	0.0277144
		52.5	0.0270877
		52.575	0.0264386
		52.65	0.0257829
		52.725	0.0251341
		52.8	0.0245035
		52.875	0.0238998
		52.95	0.0233293
		53.025	0.0227957
		53.1	0.0223011
		53.175	0.0218462
		53.25	0.0214303
		53.325	0.0210525
		53.4	0.0207112
		53.475	0.0204046
		53.55	0.0201309
		53.625	0.0198879
		53.7	0.0196733
		53.775	0.0194845
		53.85	0.019318
		53.925	0.0191699
		54	0.0190358
		54.075	0.0189104
		54.15	0.018788
		54.225	0.0186622
		54.3	0.0185265
		54.375	0.0183745
		54.45	0.0181998
		54.525	0.0179964
		54.6	0.017759
		54.675	0.0174832
		54.75	0.0171654
		54.825	0.0168034
		54.9	0.0163959
		54.975	0.0159429
		55.05	0.0154457
		55.125	0.0149065
		55.2	0.0143289
		55.275	0.013717
		55.35	0.0130761
		55.425	0.0124117
		55.5	0.0117302
		55.575	0.0110379
		55.65	0.0103415
		55.725	0.00964745
		55.8	0.00896215
		55.875	0.00829162
		55.95	0.00764145
		56.025	0.00701669
		56.1	0.00642179
		56.175	0.0058606
		56.25	0.00533622
		56.325	0.00485113
		56.4	0.00440711
		56.475	0.00400532
		56.55	0.00364632
		56.625	0.00333013
		56.7	0.00305632
		56.775	0.00282401
		56.85	0.00263199
		56.925	0.00247875
		57	0.00236259
		57.075	0.00228158
		57.15	0.00223375
		57.225	0.00221699
		57.3	0.00222917
		57.375	0.00226815
		57.45	0.00233179
		57.525	0.00241796
		57.6	0.00252452
		57.675	0.00264945
		57.75	0.00279068
		57.825	0.00294619
		57.9	0.003114
		57.975	0.00329214
		58.05	0.00347865
		58.125	0.0036716
		58.2	0.00386908
		58.275	0.00406919
		58.35	0.00427008
		58.425	0.00446992
		58.5	0.00466692
		58.575	0.00485938
		58.65	0.00504565
		58.725	0.00522422
		58.8	0.0053937
		58.875	0.00555288
		58.95	0.00570081
		59.025	0.00583677
		59.1	0.00596046
		59.175	0.00607209
		59.25	0.00617247
		59.325	0.0062632
		59.4	0.00634691
		59.475	0.00642747
		59.55	0.00651014
		59.625	0.00660183
		59.7	0.00671119
		59.775	0.00684851
		59.85	0.00702546
		59.925	0.00725461
		60	0.00754849
		60.075	0.00791847
		60.15	0.00837338
		60.225	0.00891794
		60.3	0.00955126
		60.375	0.0102657
		60.45	0.0110464
		60.525	0.011871
		60.6	0.0127114
		60.675	0.013535
		60.75	0.0143082
		60.825	0.0149992
		60.9	0.0155815
		60.975	0.016037
		61.05	0.0163583
		61.125	0.0165495
		61.2	0.0166261
		61.275	0.0166133
		61.35	0.0165438
		61.425	0.0164541
		61.5	0.016381
		61.575	0.0163589
		61.65	0.0164163
		61.725	0.0165747
		61.8	0.0168471
		61.875	0.0172388
		61.95	0.0177472
		62.025	0.0183638
		62.1	0.0190753
		62.175	0.019865
		62.25	0.0207148
		62.325	0.0216054
		62.4	0.022518
		62.475	0.0234346
		62.55	0.0243381
		62.625	0.0252132
		62.7	0.0260457
		62.775	0.026823
		62.85	0.0275343
		62.925	0.02817
		63	0.0287222
		63.075	0.0291842
		63.15	0.0295511
		63.225	0.0298192
		63.3	0.0299861
		63.375	0.0300508
		63.45	0.0300135
		63.525	0.0298755
		63.6	0.0296392
		63.675	0.0293078
		63.75	0.0288855
		63.825	0.0283774
		63.9	0.0277891
		63.975	0.0271272
		64.05	0.0263986
		64.125	0.0256111
		64.2	0.0247727
		64.275	0.0238921
		64.35	0.022978
		64.425	0.0220396
		64.5	0.021086
		64.575	0.0201264
		64.65	0.0191698
		64.725	0.0182246
		64.8	0.017299
		64.875	0.0164003
		64.95	0.0155353
		65.025	0.0147096
		65.1	0.0139281
		65.175	0.0131945
		65.25	0.0125117
		65.325	0.0118812
		65.4	0.0113039
		65.475	0.0107795
		65.55	0.0103068
		65.625	0.00988401
		65.7	0.0095085
		65.775	0.0091771
		65.85	0.00888617
		65.925	0.0086317
		66	0.00840941
		66.075	0.00821485
		66.15	0.0080435
		66.225	0.00789086
		66.3	0.00775249
		66.375	0.00762412
		66.45	0.00750171
		66.525	0.0073815
		66.6	0.00726004
		66.675	0.00713428
		66.75	0.00700156
		66.825	0.00685966
		66.9	0.00670681
		66.975	0.00654171
		67.05	0.00636352
		67.125	0.00617185
		67.2	0.00596682
		67.275	0.00574884
		67.35	0.0055188
		67.425	0.00527788
		67.5	0.00502758
		67.575	0.00476963
		67.65	0.00450592
		67.725	0.00423849
		67.8	0.00396943
		67.875	0.00370086
		67.95	0.00343482
		68.025	0.00317329
		68.1	0.0029181
		68.175	0.00267094
		68.25	0.00243327
		68.325	0.00220634
		68.4	0.00199117
		68.475	0.00178857
		68.55	0.00159908
		68.625	0.00142304
		68.7	0.00126059
		68.775	0.00111164
		68.85	0.000975957
		68.925	0.000853139
		69	0.000742672
		69.075	0.000643916
		69.15	0.000556217
		69.225	0.000478801
		69.3	0.000410886
		69.375	0.000351676
		69.45	0.000300381
		69.525	0.000256225
		69.6	0.000218464
		69.675	0.000186393
		69.75	0.00015935
		69.825	0.000136725
		69.9	0.000117958
		69.975	0.000102544
		70.05	9.00298e-05
		70.125	8.00071e-05
		70.2	7.21396e-05
		70.275	6.61102e-05
		70.35	6.16541e-05
		70.425	5.85558e-05
		70.5	5.66074e-05
		70.575	5.56562e-05
		70.65	5.557e-05
		70.725	5.62516e-05
		70.8	5.75956e-05
		70.875	5.9544e-05
		70.95	6.20466e-05
		71.025	6.50682e-05
		71.1	6.85874e-05
		71.175	7.25958e-05
		71.25	7.70973e-05
		71.325	8.21085e-05
		71.4	8.76591e-05
		71.475	9.3793e-05
		71.55	0.00010057
		71.625	0.00010807
		71.7	0.000116391
		71.775	0.000125658
		71.85	0.000136026
		71.925	0.000147683
		72	0.000160857
		72.075	0.00017583
		72.15	0.000192901
		72.225	0.000212476
		72.3	0.000234993
		72.375	0.000260974
		72.45	0.000290987
		72.525	0.000325695
		72.6	0.000365856
		72.675	0.000412267
		72.75	0.000465806
		72.825	0.00052741
		72.9	0.000598054
		72.975	0.000678741
		73.05	0.000770462
		73.125	0.000874215
		73.2	0.000990873
		73.275	0.00112124
		73.35	0.00126598
		73.425	0.00142554
		73.5	0.00160015
		73.575	0.00178976
		73.65	0.00199399
		73.725	0.00221209
		73.8	0.00244296
		73.875	0.00268508
		73.95	0.00293655
		74.025	0.00319507
		74.1	0.00345798
		74.175	0.00372229
		74.25	0.00398476
		74.325	0.00424197
		74.4	0.00449036
		74.475	0.00472638
		74.55	0.00494658
		74.625	0.00514771
		74.7	0.00532677
		74.775	0.00548114
		74.85	0.00560874
		74.925	0.00570799
		75	0.00577791
		75.075	0.00581816
		75.15	0.00582903
		75.225	0.00581145
		75.3	0.00576692
		75.375	0.00569753
		75.45	0.0056058
		75.525	0.00549467
		75.6	0.00536736
		75.675	0.00522728
		75.75	0.00507795
		75.825	0.00492286
		75.9	0.00476541
		75.975	0.00460881
		76.05	0.00445599
		76.125	0.00430961
		76.2	0.00417193
		76.275	0.00404484
		76.35	0.00392985
		76.425	0.00382806
		76.5	0.00374021
		76.575	0.00366669
		76.65	0.00360756
		76.725	0.00356262
		76.8	0.00353145
		76.875	0.00351345
		76.95	0.00350786
		77.025	0.00351385
		77.1	0.00353054
		77.175	0.00355699
		77.25	0.00359231
		77.325	0.00363563
		77.4	0.00368614
		77.475	0.00374311
		77.55	0.00380587
		77.625	0.00387386
		77.7	0.00394658
		77.775	0.00402365
		77.85	0.00410473
		77.925	0.00418959
		78	0.0042781
		78.075	0.00437016
		78.15	0.00446572
		78.225	0.00456482
		78.3	0.00466754
		78.375	0.00477398
		78.45	0.00488429
		78.525	0.00499865
		78.6	0.00511725
		78.675	0.00524031
		78.75	0.00536804
		78.825	0.00550068
		78.9	0.00563847
		78.975	0.00578164
		79.05	0.00593046
		79.125	0.00608512
		79.2	0.00624584
		79.275	0.00641284
		79.35	0.00658632
		79.425	0.00676645
		79.5	0.0069534
		79.575	0.00714734
		79.65	0.00734835
		79.725	0.00755658
		79.8	0.00777206
		79.875	0.00799487
		79.95	0.00822505
		80.025	0.00846263
		80.1	0.00870754
		80.175	0.00895977
		80.25	0.00921926
		80.325	0.00948591
		80.4	0.00975962
		80.475	0.0100403
		80.55	0.0103277
		80.625	0.0106218
		80.7	0.0109223
		80.775	0.011229
		80.85	0.0115418
		80.925	0.0118605
		81	0.0121848
		81.075	0.0125145
		81.15	0.0128494
		81.225	0.0131893
		81.3	0.013534
		81.375	0.0138833
		81.45	0.014237
		81.525	0.014595
		81.6	0.0149571
		81.675	0.0153233
		81.75	0.0156934
		81.825	0.0160673
		81.9	0.0164452
		81.975	0.0168269
		82.05	0.0172125
		82.125	0.0176022
		82.2	0.0179962
		82.275	0.0183945
		82.35	0.0187976
		82.425	0.0192057
		82.5	0.0196193
		82.575	0.0200388
		82.65	0.0204648
		82.725	0.0208978
		82.8	0.0213387
		82.875	0.0217881
		82.95	0.0222471
		83.025	0.0227165
		83.1	0.0231974
		83.175	0.0236909
		83.25	0.0241984
		83.325	0.024721
		83.4	0.0252602
		83.475	0.0258174
		83.55	0.0263939
		83.625	0.0269914
		83.7	0.0276111
		83.775	0.0282546
		83.85	0.0289232
		83.925	0.0296182
		84	0.0303405
		84.075	0.0310912
		84.15	0.0318709
		84.225	0.03268
		84.3	0.0335186
		84.375	0.0343864
		84.45	0.0352827
		84.525	0.0362065
		84.6	0.037156
		84.675	0.0381293
		84.75	0.0391239
		84.825	0.0401366
		84.9	0.041164
		84.975	0.042202
		85.05	0.0432464
		85.125	0.0442922
		85.2	0.0453346
		85.275	0.0463681
		85.35	0.0473873
		85.425	0.0483868
		85.5	0.049361
		85.575	0.0503046
		85.65	0.0512125
		85.725	0.0520798
		85.8	0.0529022
		85.875	0.0536757
		85.95	0.0543969
		86.025	0.0550631
		86.1	0.055672
		86.175	0.0562222
		86.25	0.0567128
		86.325	0.0571436
		86.4	0.0575151
		86.475	0.0578283
		86.55	0.0580847
		86.625	0.0582864
		86.7	0.0584359
		86.775	0.0585358
		86.85	0.0585893
		86.925	0.0585996
		87	0.0585698
		87.075	0.0585035
		87.15	0.0584039
		87.225	0.0582741
		87.3	0.0581172
		87.375	0.0579361
		87.45	0.0577333
		87.525	0.0575113
		87.6	0.0572721
		87.675	0.0570175
		87.75	0.0567491
		87.825	0.0564682
		87.9	0.0561756
		87.975	0.0558723
		88.05	0.0555587
		88.125	0.055235
		88.2	0.0549015
		88.275	0.054558
		88.35	0.0542043
		88.425	0.0538402
		88.5	0.0534652
		88.575	0.0530787
		88.65	0.0526802
		88.725	0.0522691
		88.8	0.0518447
		88.875	0.0514065
		88.95	0.0509537
		89.025	0.0504857
		89.1	0.0500021
		89.175	0.0495023
		89.25	0.0489859
		89.325	0.0484525
		89.4	0.0479019
		89.475	0.047334
		89.55	0.0467488
		89.625	0.0461465
		89.7	0.0455272
		89.775	0.0448914
		89.85	0.0442397
		89.925	0.0435727
		90	0.0428913
		90.075	0.0421965
		90.15	0.0414893
		90.225	0.040771
		90.3	0.040043
		90.375	0.0393065
		90.45	0.0385633
		90.525	0.0378147
		90.6	0.0370626
		90.675	0.0363084
		90.75	0.0355539
		90.825	0.0348008
		90.9	0.0340506
		90.975	0.0333049
		91.05	0.0325653
		91.125	0.0318331
		91.2	0.0311098
		91.275	0.0303966
		91.35	0.0296946
		91.425	0.0290048
		91.5	0.0283281
		91.575	0.0276653
		91.65	0.0270169
		91.725	0.0263835
		91.8	0.0257654
		91.875	0.0251628
		91.95	0.0245759
		92.025	0.0240046
		92.1	0.0234489
		92.175	0.0229085
		92.25	0.0223831
		92.325	0.0218724
		92.4	0.021376
		92.475	0.0208934
		92.55	0.0204241
		92.625	0.0199674
		92.7	0.019523
		92.775	0.0190901
		92.85	0.0186682
		92.925	0.0182567
		93	0.017855
		93.075	0.0174625
		93.15	0.0170788
		93.225	0.0167033
		93.3	0.0163355
		93.375	0.0159749
		93.45	0.0156211
		93.525	0.0152738
		93.6	0.0149325
		93.675	0.0145969
		93.75	0.0142668
		93.825	0.0139418
		93.9	0.0136217
		93.975	0.0133063
		94.05	0.0129954
		94.125	0.0126889
		94.2	0.0123866
		94.275	0.0120884
		94.35	0.0117942
		94.425	0.0115039
		94.5	0.0112175
		94.575	0.010935
		94.65	0.0106562
		94.725	0.0103812
		94.8	0.0101099
		94.875	0.00984239
		94.95	0.00957861
		95.025	0.0093186
		95.1	0.00906241
		95.175	0.00881001
		95.25	0.00856144
		95.325	0.00831673
		95.4	0.00807588
		95.475	0.00783897
		95.55	0.00760599
		95.625	0.00737699
		95.7	0.007152
		95.775	0.00693105
		95.85	0.00671416
		95.925	0.00650135
		96	0.00629266
		96.075	0.00608812
		96.15	0.00588773
		96.225	0.00569153
		96.3	0.00549953
		96.375	0.00531173
		96.45	0.00512815
		96.525	0.00494879
		96.6	0.00477367
		96.675	0.00460282
		96.75	0.0044362
		96.825	0.00427383
		96.9	0.00411572
		96.975	0.00396182
		97.05	0.00381217
		97.125	0.00366675
		97.2	0.00352554
		97.275	0.00338855
		97.35	0.00325575
		97.425	0.00312714
		97.5	0.00300269
		97.575	0.00288241
		97.65	0.00276627
		97.725	0.00265426
		97.8	0.00254635
		97.875	0.00244254
		97.95	0.00234279
		98.025	0.00224713
		98.1	0.00215548
		98.175	0.00206783
		98.25	0.00198417
		98.325	0.00190448
		98.4	0.0018287
		98.475	0.00175684
		98.55	0.00168887
		98.625	0.00162474
		98.7	0.00156444
		98.775	0.00150791
		98.85	0.00145513
		98.925	0.00140606
		99	0.00136067
		99.075	0.00131892
		99.15	0.00128076
		99.225	0.00124616
		99.3	0.00121506
		99.375	0.00118742
		99.45	0.0011632
		99.525	0.00114235
		99.6	0.00112482
		99.675	0.00111056
		99.75	0.00109952
		99.825	0.00109166
		99.9	0.00108692
		99.975	0.00108525
		100.05	0.0010866
		100.125	0.00109093
		100.2	0.00109818
		100.275	0.0011083
		100.35	0.00112125
		100.425	0.00113699
		100.5	0.00115548
		100.575	0.00117666
		100.65	0.00120051
		100.725	0.00122698
		100.8	0.00125605
		100.875	0.00128767
		100.95	0.00132182
		101.025	0.0013585
		101.1	0.00139766
		101.175	0.0014393
		101.25	0.00148341
		101.325	0.00152997
		101.4	0.00157898
		101.475	0.00163044
		101.55	0.00168436
		101.625	0.00174075
		101.7	0.00179962
		101.775	0.00186098
		101.85	0.00192486
		101.925	0.00199129
		102	0.00206028
		102.075	0.00213188
		102.15	0.0022061
		102.225	0.00228299
		102.3	0.00236257
		102.375	0.0024449
		102.45	0.00252999
		102.525	0.00261788
		102.6	0.00270861
		102.675	0.00280219
		102.75	0.00289864
		102.825	0.00299797
		102.9	0.0031002
		102.975	0.00320531
		103.05	0.00331329
		103.125	0.00342412
		103.2	0.00353775
		103.275	0.00365414
		103.35	0.00377319
		103.425	0.00389485
		103.5	0.00401899
		103.575	0.0041455
		103.65	0.00427422
		103.725	0.00440498
		103.8	0.0045376
		103.875	0.00467188
		103.95	0.00480756
		104.025	0.0049444
		104.1	0.00508213
		104.175	0.00522044
		104.25	0.00535904
		104.325	0.00549755
		104.4	0.00563566
		104.475	0.00577299
		104.55	0.00590915
		104.625	0.00604375
		104.7	0.00617639
		104.775	0.00630666
		104.85	0.00643416
		104.925	0.00655847
		105	0.00667919
		105.075	0.00679593
		105.15	0.00690828
		105.225	0.00701589
		105.3	0.00711838
		105.375	0.00721542
		105.45	0.00730671
		105.525	0.00739194
		105.6	0.00747086
		105.675	0.00754323
		105.75	0.00760888
		105.825	0.00766762
		105.9	0.00771934
		105.975	0.00776397
		106.05	0.00780143
		106.125	0.00783174
		106.2	0.00785491
		106.275	0.00787102
		106.35	0.00788018
		106.425	0.00788251
		106.5	0.0078782
		106.575	0.00786745
		106.65	0.0078505
		106.725	0.00782761
		106.8	0.00779907
		106.875	0.0077652
		106.95	0.00772631
		107.025	0.00768276
		107.1	0.0076349
		107.175	0.00758308
		107.25	0.00752768
		107.325	0.00746906
		107.4	0.0074076
		107.475	0.00734365
		107.55	0.00727756
		107.625	0.00720969
		107.7	0.00714037
		107.775	0.0070699
		107.85	0.00699859
		107.925	0.00692673
		108	0.00685456
		108.075	0.00678233
		108.15	0.00671027
		108.225	0.00663856
		108.3	0.00656739
		108.375	0.00649689
		108.45	0.00642721
		108.525	0.00635844
		108.6	0.00629067
		108.675	0.00622398
		108.75	0.0061584
		108.825	0.00609397
		108.9	0.0060307
		108.975	0.00596858
		109.05	0.00590761
		109.125	0.00584774
		109.2	0.00578895
		109.275	0.00573118
		109.35	0.00567438
		109.425	0.00561848
		109.5	0.00556341
		109.575	0.0055091
		109.65	0.00545547
		109.725	0.00540245
		109.8	0.00534995
		109.875	0.00529791
		109.95	0.00524624
		110.025	0.00519487
		110.1	0.00514372
		110.175	0.00509273
		110.25	0.00504184
		110.325	0.00499097
		110.4	0.00494008
		110.475	0.00488912
		110.55	0.00483802
		110.625	0.00478677
		110.7	0.0047353
		110.775	0.00468361
		110.85	0.00463164
		110.925	0.00457939
		111	0.00452684
		111.075	0.00447396
		111.15	0.00442076
		111.225	0.00436722
		111.3	0.00431335
		111.375	0.00425914
		111.45	0.0042046
		111.525	0.00414974
		111.6	0.00409457
		111.675	0.00403911
		111.75	0.00398336
		111.825	0.00392735
		111.9	0.0038711
		111.975	0.00381463
		112.05	0.00375797
		112.125	0.00370113
		112.2	0.00364414
		112.275	0.00358703
		112.35	0.00352983
		112.425	0.00347256
		112.5	0.00341525
		112.575	0.00335794
		112.65	0.00330064
		112.725	0.00324339
		112.8	0.00318621
		112.875	0.00312914
		112.95	0.00307219
		113.025	0.00301541
		113.1	0.00295881
		113.175	0.00290243
		113.25	0.00284628
		113.325	0.0027904
		113.4	0.0027348
		113.475	0.00267952
		113.55	0.00262458
		113.625	0.00256999
		113.7	0.00251579
		113.775	0.00246199
		113.85	0.00240861
		113.925	0.00235568
		114	0.00230319
		114.075	0.0022512
		114.15	0.0021997
		114.225	0.00214872
		114.3	0.00209827
		114.375	0.00204836
		114.45	0.00199901
		114.525	0.00195023
		114.6	0.00190203
		114.675	0.00185443
		114.75	0.00180744
		114.825	0.00176107
		114.9	0.00171532
		114.975	0.00167021
		115.05	0.00162575
		115.125	0.00158194
		115.2	0.00153878
		115.275	0.0014963
		115.35	0.00145449
		115.425	0.00141336
		115.5	0.00137291
		115.575	0.00133314
		115.65	0.00129407
		115.725	0.00125569
		115.8	0.00121801
		115.875	0.00118102
		115.95	0.00114474
		116.025	0.00110916
		116.1	0.00107428
		116.175	0.0010401
		116.25	0.00100662
		116.325	0.000973842
		116.4	0.000941765
		116.475	0.000910385
		116.55	0.000879701
		116.625	0.00084971
		116.7	0.000820409
		116.775	0.000791795
		116.85	0.000763865
		116.925	0.000736613
		117	0.000710035
		117.075	0.000684127
		117.15	0.000658884
		117.225	0.000634289
		117.3	0.000610358
		117.375	0.000587073
		117.45	0.000564427
		117.525	0.000542414
		117.6	0.000521026
		117.675	0.000500256
		117.75	0.000480096
		117.825	0.000460537
		117.9	0.000441572
		117.975	0.000423191
		118.05	0.000405386
		118.125	0.000388148
		118.2	0.000371466
		118.275	0.000355323
		118.35	0.000339729
		118.425	0.000324662
		118.5	0.000310113
		118.575	0.000296072
		118.65	0.000282527
		118.725	0.000269469
		118.8	0.000256888
		118.875	0.000244771
		118.95	0.00023311
		119.025	0.000221892
		119.1	0.000211107
		119.175	0.000200744
		119.25	0.000190793
		119.325	0.000181242
		119.4	0.00017208
		119.475	0.000163297
		119.55	0.000154882
		119.625	0.000146824
		119.7	0.000139112
		119.775	0.000131737
		119.85	0.000124686
		119.925	0.000117951
		120	0.00011152
		120.075	0.000105384
		120.15	9.95321e-05
		120.225	9.3955e-05
		120.3	8.86427e-05
		120.375	8.35858e-05
		120.45	7.87748e-05
		120.525	7.42006e-05
		120.6	6.9854e-05
		120.675	6.57262e-05
		120.75	6.18087e-05
		120.825	5.80928e-05
		120.9	5.45705e-05
		120.975	5.12335e-05
		121.05	4.80742e-05
		121.125	4.50848e-05
		121.2	4.22579e-05
		121.275	3.95864e-05
		121.35	3.70632e-05
		121.425	3.46815e-05
		121.5	3.24349e-05
		121.575	3.03168e-05
		121.65	2.83113e-05
		121.725	2.64336e-05
		121.8	2.46665e-05
		121.875	2.30046e-05
		121.95	2.14427e-05
		122.025	1.99755e-05
		122.1	1.85982e-05
		122.175	1.73061e-05
		122.25	1.60947e-05
		122.325	1.49596e-05
		122.4	1.38967e-05
		122.475	1.2902e-05
		122.55	1.19717e-05
		122.625	1.11022e-05
		122.7	1.02899e-05
		122.775	9.5317e-06
		122.85	8.82431e-06
		122.925	8.16477e-06
		123	7.55021e-06
		123.075	6.97793e-06
		123.15	6.44534e-06
		123.225	5.9408e-06
		123.3	5.48156e-06
		123.375	5.0549e-06
		123.45	4.65877e-06
		123.525	4.29121e-06
		123.6	3.95036e-06
		123.675	3.63449e-06
		123.75	3.34194e-06
		123.825	3.07117e-06
		123.9	2.82071e-06
		123.975	2.58918e-06
		124.05	2.37528e-06
		124.125	2.17779e-06
		124.2	1.99557e-06
		124.275	1.82754e-06
		124.35	1.67269e-06
		124.425	1.53007e-06
		124.5	1.39881e-06
		124.575	1.27807e-06
		124.65	1.16707e-06
		124.725	1.0651e-06
		124.8	9.71473e-07
		124.875	8.85565e-07
		124.95	8.06786e-07
		125.025	7.34591e-07
		125.1	6.68468e-07
		125.175	6.07946e-07
		125.25	5.52582e-07
		125.325	5.0197e-07
		125.4	4.55729e-07
		125.475	4.13509e-07
		125.55	3.74982e-07
		125.625	3.39848e-07
		125.7	3.07828e-07
		125.775	2.78663e-07
		125.85	2.52115e-07
		125.925	2.18338e-07
		126	1.97331e-07
		126.075	1.7824e-07
		126.15	1.60902e-07
		126.225	1.45166e-07
		126.3	1.30892e-07
		126.375	1.17952e-07
		126.45	1.0623e-07
		126.525	9.56163e-08
		126.6	8.60129e-08
		126.675	7.73287e-08
		126.75	6.94806e-08
		126.825	6.23925e-08
		126.9	5.59947e-08
		126.975	5.02235e-08
		127.05	4.50208e-08
		127.125	4.03334e-08
		127.2	3.61129e-08
		127.275	3.23152e-08
		127.35	2.88998e-08
		127.425	2.58304e-08
		127.5	2.30734e-08
		127.575	2.05986e-08
		127.65	1.83785e-08
		127.725	1.63881e-08
		127.8	1.46047e-08
		127.875	1.30078e-08
		127.95	1.15787e-08
		128.025	1.03005e-08
		128.1	0
		128.175	0
		128.25	0
		128.325	0
		128.4	0
		128.475	0
		128.55	0
		128.625	0
		128.7	0
		128.775	0
		128.85	0
		128.925	0
		129	0
		129.075	0
		129.15	0
		129.225	0
		129.3	0
		129.375	0
		129.45	0
		129.525	0
		129.6	0
		129.675	0
		129.75	0
		129.825	0
		129.9	0
		129.975	0
		130.05	0
		130.125	0
		130.2	0
		130.275	1.10242e-08
		130.35	1.28362e-08
		130.425	1.49316e-08
		130.5	1.73519e-08
		130.575	2.0145e-08
		130.65	2.33648e-08
		130.725	2.70728e-08
		130.8	3.13386e-08
		130.875	3.62412e-08
		130.95	4.18698e-08
		131.025	4.83253e-08
		131.1	5.57218e-08
		131.175	6.41876e-08
		131.25	7.38675e-08
		131.325	8.49241e-08
		131.4	9.75404e-08
		131.475	1.11922e-07
		131.55	1.28298e-07
		131.625	1.46927e-07
		131.7	1.68096e-07
		131.775	1.92128e-07
		131.85	2.19382e-07
		131.925	2.50257e-07
		132	2.85198e-07
		132.075	3.24701e-07
		132.15	3.69314e-07
		132.225	4.19647e-07
		132.3	4.76375e-07
		132.375	5.40243e-07
		132.45	6.12076e-07
		132.525	6.92783e-07
		132.6	7.83366e-07
		132.675	8.8493e-07
		132.75	9.98685e-07
		132.825	1.12596e-06
		132.9	1.26822e-06
		132.975	1.42706e-06
		133.05	1.60423e-06
		133.125	1.80163e-06
		133.2	2.02134e-06
		133.275	2.26564e-06
		133.35	2.53698e-06
		133.425	2.83805e-06
		133.5	3.17175e-06
		133.575	3.54122e-06
		133.65	3.94987e-06
		133.725	4.40139e-06
		133.8	4.89972e-06
		133.875	5.44916e-06
		133.95	6.05429e-06
		134.025	6.72006e-06
		134.1	7.45175e-06
		134.175	8.25505e-06
		134.25	9.13603e-06
		134.325	1.01011e-05
		134.4	1.11573e-05
		134.475	1.23119e-05
		134.55	1.35727e-05
		134.625	1.4948e-05
		134.7	1.64466e-05
		134.775	1.80777e-05
		134.85	1.98513e-05
		134.925	2.17775e-05
		135	2.38674e-05
		135.075	2.61322e-05
		135.15	2.85841e-05
		135.225	3.12355e-05
		135.3	3.40995e-05
		135.375	3.71898e-05
		135.45	4.05205e-05
		135.525	4.41065e-05
		135.6	4.79629e-05
		135.675	5.21057e-05
		135.75	5.6551e-05
		135.825	6.13156e-05
		135.9	6.64168e-05
		135.975	7.18721e-05
		136.05	7.76996e-05
		136.125	8.39177e-05
		136.2	9.05448e-05
		136.275	9.76e-05
		136.35	0.000105102
		136.425	0.000113071
		136.5	0.000121525
		136.575	0.000130483
		136.65	0.000139965
		136.725	0.000149989
		136.8	0.000160575
		136.875	0.00017174
		136.95	0.000183502
		137.025	0.000195878
		137.1	0.000208885
		137.175	0.000222538
		137.25	0.000236852
		137.325	0.00025184
		137.4	0.000267516
		137.475	0.00028389
		137.55	0.000300972
		137.625	0.000318771
		137.7	0.000337292
		137.775	0.000356542
		137.85	0.000376522
		137.925	0.000397233
		138	0.000418675
		138.075	0.000440844
		138.15	0.000463733
		138.225	0.000487334
		138.3	0.000511637
		138.375	0.000536628
		138.45	0.00056229
		138.525	0.000588603
		138.6	0.000615547
		138.675	0.000643096
		138.75	0.000671222
		138.825	0.000699895
		138.9	0.000729079
		138.975	0.00075874
		139.05	0.000788836
		139.125	0.000819326
		139.2	0.000850163
		139.275	0.0008813
		139.35	0.000912686
		139.425	0.000944267
		139.5	0.000975987
		139.575	0.00100779
		139.65	0.00103961
		139.725	0.00107139
		139.8	0.00110306
		139.875	0.00113456
		139.95	0.00116582
		140.025	0.00119678
		140.1	0.00122735
		140.175	0.00125748
		140.25	0.00128709
		140.325	0.00131612
		140.4	0.00134448
		140.475	0.00137211
		140.55	0.00139895
		140.625	0.00142491
		140.7	0.00144995
		140.775	0.00147398
		140.85	0.00149695
		140.925	0.00151879
		141	0.00153945
		141.075	0.00155886
		141.15	0.00157698
		141.225	0.00159375
		141.3	0.00160913
		141.375	0.00162307
		141.45	0.00163554
		141.525	0.00164649
		141.6	0.00165589
		141.675	0.00166373
		141.75	0.00166997
		141.825	0.00167459
		141.9	0.00167759
		141.975	0.00167896
		142.05	0.00167869
		142.125	0.00167678
		142.2	0.00167323
		142.275	0.00166806
		142.35	0.00166129
		142.425	0.00165293
		142.5	0.00164301
		142.575	0.00163155
		142.65	0.00161859
		142.725	0.00160416
		142.8	0.00158831
		142.875	0.00157109
		142.95	0.00155253
		143.025	0.0015327
		143.1	0.00151164
		143.175	0.00148943
		143.25	0.0014661
		143.325	0.00144172
		143.4	0.00141637
		143.475	0.00139011
		143.55	0.00136301
		143.625	0.00133512
		143.7	0.00130653
		143.775	0.00127731
		143.85	0.00124752
		143.925	0.00121724
		144	0.00118653
		144.075	0.00115547
		144.15	0.00112413
		144.225	0.00109256
		144.3	0.00106085
		144.375	0.00102906
		144.45	0.000997242
		144.525	0.000965467
		144.6	0.000933794
		144.675	0.000902279
		144.75	0.000870978
		144.825	0.000839944
		144.9	0.000809226
		144.975	0.000778873
		145.05	0.000748928
		145.125	0.000719434
		145.2	0.000690429
		145.275	0.00066195
		145.35	0.000634028
		145.425	0.000606695
		145.5	0.000579977
		145.575	0.000553898
		145.65	0.00052848
		145.725	0.00050374
		145.8	0.000479696
		145.875	0.000456358
		145.95	0.000433738
		146.025	0.000411844
		146.1	0.000390681
		146.175	0.000370251
		146.25	0.000350557
		146.325	0.000331595
		146.4	0.000313364
		146.475	0.000295857
		146.55	0.000279069
		146.625	0.00026299
		146.7	0.000247611
		146.775	0.00023292
		146.85	0.000218905
		146.925	0.000205552
		147	0.000192846
		147.075	0.000180783
		147.15	0.000169327
		147.225	0.00015847
		147.3	0.000148194
		147.375	0.000138483
		147.45	0.000129317
		147.525	0.000120679
		147.6	0.00011255
		147.675	0.000104912
		147.75	9.77463e-05
		147.825	9.10345e-05
		147.9	8.47586e-05
		147.975	7.89007e-05
		148.05	7.34431e-05
		148.125	6.83687e-05
		148.2	6.36606e-05
		148.275	5.93024e-05
		148.35	5.52783e-05
		148.425	5.15728e-05
		148.5	4.81711e-05
		148.575	4.50589e-05
		148.65	4.22225e-05
		148.725	3.96489e-05
		148.8	3.73256e-05
		148.875	3.52408e-05
		148.95	3.33832e-05
		149.025	3.17422e-05
		149.1	3.0308e-05
		149.175	2.90712e-05
		149.25	2.80231e-05
		149.325	2.71557e-05
		149.4	2.64616e-05
		149.475	2.59339e-05
		149.55	2.55664e-05
		149.625	2.53533e-05
		149.7	2.52897e-05
		149.775	2.5371e-05
		149.85	2.55932e-05
		149.925	2.59528e-05
		150	2.64468e-05
		150.075	2.70728e-05
		150.15	2.78287e-05
		150.225	2.87131e-05
		150.3	2.97248e-05
		150.375	3.08632e-05
		150.45	3.21279e-05
		150.525	3.35192e-05
		150.6	3.50376e-05
		150.675	3.66839e-05
		150.75	3.84593e-05
		150.825	4.03654e-05
		150.9	4.2404e-05
		150.975	4.45774e-05
		151.05	4.68881e-05
		151.125	4.93386e-05
		151.2	5.19321e-05
		151.275	5.46718e-05
		151.35	5.75612e-05
		151.425	6.06039e-05
		151.5	6.3804e-05
		151.575	6.71655e-05
		151.65	7.06927e-05
		151.725	7.43901e-05
		151.8	7.82624e-05
		151.875	8.23143e-05
		151.95	8.65507e-05
		152.025	9.09768e-05
		152.1	9.55978e-05
		152.175	0.000100419
		152.25	0.000105445
		152.325	0.000110683
		152.4	0.000116137
		152.475	0.000121813
		152.55	0.000127717
		152.625	0.000133855
		152.7	0.000140231
		152.775	0.000146853
		152.85	0.000153725
		152.925	0.000160854
		153	0.000168245
		153.075	0.000175904
		153.15	0.000183837
		153.225	0.000192048
		153.3	0.000200544
		153.375	0.00020933
		153.45	0.000218412
		153.525	0.000227794
		153.6	0.000237483
		153.675	0.000247481
		153.75	0.000257796
		153.825	0.000268422
		153.9	0.000279382
		153.975	0.000290672
		154.05	0.000302294
		154.125	0.000314254
		154.2	0.000326554
		154.275	0.000339198
		154.35	0.000352189
		154.425	0.00036553
		154.5	0.000379223
		154.575	0.000393271
		154.65	0.000407677
		154.725	0.00042244
		154.8	0.000437563
		154.875	0.000453047
		154.95	0.000468892
		155.025	0.000485098
		155.1	0.000501665
		155.175	0.000518593
		155.25	0.00053588
		155.325	0.000553524
		155.4	0.000571525
		155.475	0.000589879
		155.55	0.000608584
		155.625	0.000627636
		155.7	0.000647032
		155.775	0.000666766
		155.85	0.000686836
		155.925	0.000707234
		156	0.000727955
		156.075	0.000748994
		156.15	0.000770342
		156.225	0.000791993
		156.3	0.000813939
		156.375	0.000836171
		156.45	0.00085868
		156.525	0.000881457
		156.6	0.000904491
		156.675	0.000927773
		156.75	0.00095129
		156.825	0.000975031
		156.9	0.000998984
		156.975	0.00102314
		157.05	0.00104747
		157.125	0.00107199
		157.2	0.00109665
		157.275	0.00112146
		157.35	0.0011464
		157.425	0.00117145
		157.5	0.0011966
		157.575	0.00122182
		157.65	0.00124711
		157.725	0.00127244
		157.8	0.0012978
		157.875	0.00132316
		157.95	0.00134852
		158.025	0.00137384
		158.1	0.00139912
		158.175	0.00142432
		158.25	0.00144944
		158.325	0.00147444
		158.4	0.00149932
		158.475	0.00152404
		158.55	0.00154859
		158.625	0.00157295
		158.7	0.00159709
		158.775	0.00162099
		158.85	0.00164464
		158.925	0.001668
		159	0.00169106
		159.075	0.0017138
		159.15	0.00173619
		159.225	0.00175822
		159.3	0.00177985
		159.375	0.00180108
		159.45	0.00182187
		159.525	0.00184221
		159.6	0.00186207
		159.675	0.00188144
		159.75	0.00190029
		159.825	0.0019186
		159.9	0.00193636
		159.975	0.00195355
		160.05	0.00197014
		160.125	0.00198611
		160.2	0.00200145
		160.275	0.00201615
		160.35	0.00203018
		160.425	0.00204352
		160.5	0.00205617
		160.575	0.0020681
		160.65	0.0020793
		160.725	0.00208976
		160.8	0.00209947
		160.875	0.0021084
		160.95	0.00211656
		161.025	0.00212392
		161.1	0.00213048
		161.175	0.00213623
		161.25	0.00214116
		161.325	0.00214527
		161.4	0.00214854
		161.475	0.00215097
		161.55	0.00215256
		161.625	0.00215331
		161.7	0.0021532
		161.775	0.00215224
		161.85	0.00215043
		161.925	0.00214776
		162	0.00214425
		162.075	0.00213988
		162.15	0.00213467
		162.225	0.00212861
		162.3	0.00212172
		162.375	0.002114
		162.45	0.00210545
		162.525	0.00209609
		162.6	0.00208592
		162.675	0.00207495
		162.75	0.0020632
		162.825	0.00205068
		162.9	0.00203739
		162.975	0.00202336
		163.05	0.00200859
		163.125	0.00199311
		163.2	0.00197692
		163.275	0.00196005
		163.35	0.00194252
		163.425	0.00192433
		163.5	0.00190552
		163.575	0.0018861
		163.65	0.00186609
		163.725	0.00184551
		163.8	0.00182438
		163.875	0.00180273
		163.95	0.00178058
		164.025	0.00175795
		164.1	0.00173487
		164.175	0.00171136
		164.25	0.00168743
		164.325	0.00166313
		164.4	0.00163846
		164.475	0.00161347
		164.55	0.00158816
		164.625	0.00156257
		164.7	0.00153673
		164.775	0.00151065
		164.85	0.00148436
		164.925	0.00145788
		165	0.00143125
		165.075	0.00140449
		165.15	0.00137761
		165.225	0.00135065
		165.3	0.00132363
		165.375	0.00129658
		165.45	0.00126951
		165.525	0.00124244
		165.6	0.00121541
		165.675	0.00118844
		165.75	0.00116154
		165.825	0.00113473
		165.9	0.00110805
		165.975	0.0010815
		166.05	0.0010551
		166.125	0.00102889
		166.2	0.00100287
		166.275	0.000977056
		166.35	0.000951474
		166.425	0.000926138
		166.5	0.000901062
		166.575	0.000876262
		166.65	0.000851751
		166.725	0.000827545
		166.8	0.000803654
		166.875	0.000780091
		166.95	0.000756867
		167.025	0.000733994
		167.1	0.00071148
		167.175	0.000689335
		167.25	0.000667568
		167.325	0.000646185
		167.4	0.000625194
		167.475	0.0006046
		167.55	0.00058441
		167.625	0.000564629
		167.7	0.000545259
		167.775	0.000526305
		167.85	0.00050777
		167.925	0.000489656
		168	0.000471963
		168.075	0.000454694
		168.15	0.000437849
		168.225	0.000421426
		168.3	0.000405426
		168.375	0.000389848
		168.45	0.000374688
		168.525	0.000359946
		168.6	0.000345618
		168.675	0.000331701
		168.75	0.000318191
		168.825	0.000305085
		168.9	0.000292377
		168.975	0.000280064
		169.05	0.00026814
		169.125	0.000256599
		169.2	0.000245436
		169.275	0.000234646
		169.35	0.00022422
		169.425	0.000214154
		169.5	0.000204441
		169.575	0.000195073
		169.65	0.000186043
		169.725	0.000177346
		169.8	0.000168972
		169.875	0.000160915
		169.95	0.000153167
		170.025	0.000145721
		170.1	0.000138569
		170.175	0.000131704
		170.25	0.000125117
		170.325	0.000118801
		170.4	0.000112749
		170.475	0.000106952
		170.55	0.000101404
		170.625	9.60958e-05
		170.7	9.10207e-05
		170.775	8.61711e-05
		170.85	8.15396e-05
		170.925	7.71189e-05
		171	7.29018e-05
		171.075	6.88812e-05
		171.15	6.50502e-05
		171.225	6.14017e-05
		171.3	5.79292e-05
		171.375	5.46259e-05
		171.45	5.14854e-05
		171.525	4.85013e-05
		171.6	4.56675e-05
		171.675	4.29778e-05
		171.75	4.04265e-05
		171.825	3.80076e-05
		171.9	3.57157e-05
		171.975	3.35452e-05
		172.05	3.14909e-05
		172.125	2.95477e-05
		172.2	2.77105e-05
		172.275	2.59746e-05
		172.35	2.43352e-05
		172.425	2.27879e-05
		172.5	2.13283e-05
		172.575	1.99522e-05
		172.65	1.86555e-05
		172.725	1.74344e-05
		172.8	1.6285e-05
		172.875	1.52037e-05
		172.95	1.41871e-05
		173.025	1.32319e-05
		173.1	1.23347e-05
		173.175	1.14926e-05
		173.25	1.07026e-05
		173.325	9.96193e-06
		173.4	9.26782e-06
		173.475	8.61773e-06
		173.55	8.0092e-06
		173.625	7.43989e-06
		173.7	6.90757e-06
		173.775	6.4101e-06
		173.85	5.94545e-06
		173.925	5.5117e-06
		174	5.10702e-06
		174.075	4.72966e-06
		174.15	4.37796e-06
		174.225	4.05038e-06
		174.3	3.7454e-06
		174.375	3.46164e-06
		174.45	3.19776e-06
		174.525	2.9525e-06
		174.6	2.72467e-06
		174.675	2.51315e-06
		174.75	2.31687e-06
		174.825	2.13484e-06
		174.9	1.96612e-06
		174.975	1.80981e-06
		175.05	1.66508e-06
		175.125	1.53115e-06
		175.2	1.40728e-06
		175.275	1.29277e-06
		175.35	1.18698e-06
		175.425	1.08929e-06
		175.5	9.99134e-07
		175.575	9.15973e-07
		175.65	8.39307e-07
		175.725	7.68667e-07
		175.8	7.03614e-07
		175.875	6.4374e-07
		175.95	5.8866e-07
		176.025	5.3802e-07
		176.1	4.91485e-07
		176.175	4.48747e-07
		176.25	4.09517e-07
		176.325	3.73526e-07
		176.4	3.40524e-07
		176.475	3.1028e-07
		176.55	2.82579e-07
		176.625	2.57219e-07
		176.7	2.34016e-07
		176.775	2.12797e-07
		176.85	1.93403e-07
		176.925	1.66063e-07
		177	1.50838e-07
		177.075	1.36938e-07
		177.15	1.24255e-07
		177.225	1.12688e-07
		177.3	1.02145e-07
		177.375	9.25412e-08
		177.45	8.37967e-08
		177.525	7.58394e-08
		177.6	6.86022e-08
		177.675	6.20237e-08
		177.75	5.6047e-08
		177.825	5.06201e-08
		177.9	4.5695e-08
		177.975	4.12278e-08
		178.05	3.71782e-08
		178.125	3.3509e-08
		178.2	3.01863e-08
		178.275	2.71791e-08
		178.35	2.44588e-08
		178.425	2.19994e-08
		178.5	1.97771e-08
		178.575	1.77701e-08
		178.65	1.59585e-08
		178.725	1.43242e-08
		178.8	1.28506e-08
		178.875	1.15227e-08
		178.95	1.03267e-08
		179.025	0
		179.1	0
		179.175	0
		179.25	0
		179.325	0
		179.4	0
		179.475	0
		179.55	0
		179.625	0
		179.7	0
		179.775	0
		179.85	0
		179.925	0
[truncated: 1 more rows]

## Sheet: sheet1
						Major element (wt%)																	Trace element (ppm)
Sample	Rock	Longitude	Location	Zircon U-Pb Ages (Ma)	Reference	SiO2	TiO2	Al2O3	Fe2O3	FeO	TFeO	MnO	MgO	CaO	Na2O	K2O	P2O5	H2O	LOI	Total	Fe2O3/FeO		Hf	Zr	V	Sc	Co	Ni	Ga	Rb	Nb	Ba	Ta	Pb	Th	U	Cr	Sr	Y	La	Ce	Pr	Nd	Sm	Eu	Gd	Tb	Dy	Ho
TM07-51-3	Dioritic gneiss	94°27'05''	Bujiu	35	Zhang et al. (2019)	62.61	0.63	17.52	1.16389	2.93	3.9775	0.05	2.2	5.42	4.18	1.43	0.34	0.82	0.66	99.5939	0.397232		2.15	146	90	13.9	19.4	20	24.2	67	8.65	348	0.55	18	10.9	1.68	34.4	719	19.3	39.2	80.3	9.76	35.1	7.02	1.84	6.93	0.99	4.59	0.78
TM08-12-2	Granitic gneiss	93°44'54''	Zhaxi	42	Zhang et al. (2019)	66.48	0.28	16.73	1.5	1.25	2.6	0.047	1.14	3.54	5.54	2.51	0.19	0.44	0.629125	99.8361	1.2		7.36631	109	49.5	3.98	5.71	5.56	18.84	65.4	6.685	876.12	0.37534	37.22	18.3848	1.848	7.9	993.818	7.22857	41.1343	70.13	7.96005	27.2654	3.82095	0.974	2.317	0.33915	1.3587	0.250268
TM08-43-3	Hornblendite (ultramafic rock)	94°26'38''	Bujiu	45	Zhang et al. (2019)	44.64	1.29	16.7	4.36832	8.91	12.8415	0.204	6.81	11.02	2.36	0.92	0.31	0.76	1.75168	99.284	0.490271		3.81621	64.1	378.2	47.95	46.26	13.77	20.93	6.6	4.873	290.745	0.24794	12.35	7.889	0.762	48.2	531.454	26.1429	38.9734	73.74	9.11505	36.2397	7.81305	1.991	6.209	1.0143	4.81215	0.969098
TM08-43-2	Hornblendite (ultramafic rock)	94°26'37''	Bujiu	46	Zhang et al. (2019)	44.22	1.23	19.95	4.39852	7.83	11.7887	0.2	5.81	10.34	2.29	1.36	0.29	1.1	2.02148	99.94	0.561752		4.62499	76.4	291	35.06	37.47	5.68	23.31	36.3	5.073	425.565	0.22932	13.64	2.4794	0.415	15.5	739.606	29.7524	22.3477	53.59	7.6272	33.4719	7.7028	1.965	6.274	1.029	5.1009	1.08927
TM07-51-1	Dioritic gneiss	94°27'00''	Bujiu	47	Zhang et al. (2019)	54.34	1.1	17.56	1.56867	7.02	8.43181	0.12	4.73	6.83	2.63	1.78	0.29	0.8	0.58	99.3287	0.223458		2.15	179.5	210	23.1	32.7	17	20.9	75.5	7.43	354.5	0.39	10.5	5.3	1.06	91.3	453.5	21.6	26.5	53.1	6.64	31.3	7.82	1.84	7.58	0.98	4.38	0.77
T09-37-3	Garnet amphibolite	94°25'48''	Bujiu	48	Zhang et al. (2019)	46.24	1.12	18.75	3.27	7.49	10.433	0.2	5.28	9.73	3.59	1.56	0.4	1.7	0.84	98.47	0.436582		2.49	90.2	354	35.5	33	13.4	23.6	32.1	5.67	718	0.27	9.87	22	1.34	25.3	859	28.4	66.5	123	13	47.6	9.43	2.46	7.95	1.06	5.88	1.17
TM08-15-4	Granitic gneiss	94°01'10''	Zhaxi	50	Zhang et al. (2019)	66.08	0.52	15.43	2.14	2.66	4.586	0.159	1.76	3.57	4.31	1.93	0.27	0.59	0.896058	99.7251	0.804511		9.93438	138.9	64.2	23.66	7.61	4.83	20.81	150.9	21.8	239.925	1.55624	18.79	8.6534	1.701	13.4	231.868	37.5238	21.9287	45.87	6.3777	25.7544	6.6087	1.157	5.887	1.11825	5.4957	1.24141
T09-57-1	Dioritic gneiss	94°01'12''	Zhaxi	51	Zhang et al. (2019)	56.71	0.98	17.2	3.06	4.4	7.154	0.17	3.6	6.39	4.16	2.01	0.25	1.53	0.81	99.74	0.695455		2.08	64.3	171	15.8	22.5	15.9	21.7	115	6.43	172	0.49	15.3	6.21	2.23	35.3	473	15.3	17.3	40.8	5.23	20.7	4.34	1.32	3.73	0.55	3.1	0.62
T10-121-2	Granitic gneiss	94°27'33''	Bujiu	51	Zhang et al. (2019)	72.46	0.31	14.62	0.73	1.08	1.737	0.03	0.57	2.38	3.49	3.78	0.1	0.3	0.19	101.777	0.675926		3.69	128	19.9	3.11	2.01	2.99	15.9	65.9	3.37	891	0.24	18.9	7.28	0.68	7.26	526	5.24	27.5	56.5	6.37	22.9	3.61	0.91	2.12	0.23	1.18	0.19
T09-56-1	Dioritic gneiss	94°01'10''	Zhaxi	51	Zhang et al. (2019)	55.24	1.02	17.58	2.43	5.49	7.677	0.14	4	7.33	4.09	1.7	0.24	0.76	0.59	99.85	0.442623		2.7	96.8	201	18.7	24.8	26.8	22.3	81.4	5.25	306	0.33	11.4	5.26	9.68	66.3	582	13.8	17.8	40.6	5.24	21	4.22	1.29	3.8	0.52	2.91	0.54
TM08-15-2-2	Granitic gneiss	94°01'10''	Zhaxi	51	Zhang et al. (2019)	72.66	0.25	13.29	0.83	1.13	1.877	0.036	0.49	2.11	3.25	4.65	0.11	0.23	0.395769	99.2018	0.734513		6.07315	119.5	22.7	1.98	2.91	1.95	14.1	105.3	6.752	621.81	0.87024	23.62	30.478	2.075	3.6	213.542	19.1905	33.2183	64.55	7.50645	26.7466	4.81425	0.864	3.84	0.6867	3.3768	0.667013
TM08-43-1	Granitic gneiss	94°26'36''	Bujiu	52	Zhang et al. (2019)	72.64	0.36	14.03	0.62	1.87	2.428	0.043	0.86	3.5	3.8	1.26	0.15	0.35	0.588131	99.7211	0.331551		4.92235	130.9	32.4	3.78	4.88	3.06	16.63	47.6	5.178	305.13	0.34398	13.22	11.0838	1.116	6.6	384.846	7.3619	34.6295	57.08	5.91045	19.7789	2.88015	0.892	1.971	0.28665	1.2831	0.250268
T09-56-4	Granitic gneiss	94°01'16''	Zhaxi	52	Zhang et al. (2019)	70.04	0.48	14.5	1.4	2.17	3.43	0.07	1.28	3.5	3.98	1.85	0.14	0.35	0.4	99.81	0.645161		4.12	150	54.1	7.37	7.38	16.1	17.1	82.4	5.06	347	0.38	12.8	10.9	1.91	25.6	368	12.3	35.1	55.6	5.56	18	3.13	0.9	2.93	0.39	2.31	0.49
T10-91-3	Granitic gneiss	94°01'09''	Zhaxi	52	Zhang et al. (2019)	68.57	0.48	15.62	1.94	1.98	3.726	0.12	1.28	3.12	4.19	2.48	0.17	0.36	0.37	104.406	0.979798		5.03	196	55.8	10.8	6.1	2.19	17	148	8.4	680	0.75	18.4	9.48	1.64	4.24	307	20.4	25.9	51.6	6.13	22.5	4.81	1.02	4	0.57	3.46	0.69
T09-56-3	Granitic gneiss	94°01'14''	Zhaxi	53	Zhang et al. (2019)	67.39	0.54	15.94	1.17	2.6	3.653	0.07	1.3	4.15	4.02	1.5	0.16	0.56	0.36	99.2	0.45		2.99	113	57.8	3.29	7.46	7.18	18.4	66.2	4.7	272	0.26	11.2	9.01	2.04	10.8	584	6.52	44.7	68.7	6.47	19.7	2.54	0.96	1.84	0.24	1.25	0.25
TM08-43-6	Granitic gneiss	94°25'48''	Bujiu	54	Zhang et al. (2019)	75.32	0.16	12.6	0.564231	1.13	1.63781	0.035	0.43	1.66	2.86	4.69	0.1	0.12	0.525769	100.075	0.499319		3.3893	76.3	16.8	4.45	2.24	3.56	13.55	84	4.649	578.97	0.16954	29.32	12.2892	0.62	2.4	134.554	10.1238	25.9639	50.78	6.3021	23.142	4.99275	0.749	3.53	0.51555	2.14725	0.393593
T09-33-7	Granitic gneiss	94°26'12''	Bujiu	54	Zhang et al. (2019)	69.31	0.39	16.62	0.26	2.07	2.304	0.06	0.66	5.73	2.74	0.89	0.1	1	0.97	99.8	0.125604		5.19	228	52	5.65	4.97	25.9	17.7	28.2	5.15	277	0.24	8.12	12.4	0.56	44.5	602	16.5	52	99.7	10.1	35.1	4.71	1.84	3.35	0.46	2.8	0.65
T09-55-1	Granitic gneiss	94°00'30''	Zhaxi	55	Zhang et al. (2019)	66.56	0.55	16.65	0.92	3.38	4.208	0.14	1.28	3.52	4.41	1.79	0.21	0.78	0.47	99.88	0.272189		4.63	175	41.7	12.2	6.59	9.76	20.1	124	12.2	452	1	11.1	7.79	1.66	14.6	357	28.7	34	67.3	7.8	29.5	6.29	1.27	6.26	0.97	5.9	1.16
T09-57-3	Granitic gneiss	94°01'12''	Zhaxi	55	Zhang et al. (2019)	72.09	0.34	14.01	0.61	1.89	2.439	0.05	0.61	2.33	3.16	4.2	0.09	0.51	0.27	99.65	0.322751		4.84	166	26.3	1.98	4.04	8.19	15.5	117	5.31	694	0.67	23	27.8	2.62	14	333	12.8	43.1	80.1	8.63	28.6	4.73	0.83	3.38	0.46	2.63	0.51
T09-56-2	Granitic gneiss	94°01'12''	Zhaxi	62	Zhang et al. (2019)	76.37	0.19	12.63	0.62	0.92	1.478	0.05	0.25	1.5	2.76	4.37	0.05	0.19	0.23	99.94	0.673913		2.81	78	13.8	3.33	2.23	18.2	12.6	108	2.44	737	0.23	24.8	11.4	1.35	32.8	222	7	31	53.7	5.5	18.1	2.71	0.68	2.08	0.25	1.38	0.27
TM08-15-2-1	Granitic gneiss	94°01'10''	Zhaxi	63	Zhang et al. (2019)	70.46	0.34	14.32	1.06	2.23	3.184	0.091	1.33	3.16	3.71	2.53	0.13	0.49	0.738199	100.099	0.475336		7.7164	94.2	57.1	10.8	7.57	3	14.85	97.3	6.882	340.515	0.5194	16.61	8.4378	1.364	5.3	224.714	20.5143	25.0488	43.36	5.00535	17.5077	3.33795	0.76	3.278	0.609	3.15945	0.71442
T09-62-1	Granitic gneiss	94°27'10''	Bujiu	63	Zhang et al. (2019)	64.27	0.68	17.25	0.73	4.28	4.937	0.07	2.05	4.62	3.73	1.74	0.19	0.45	0.35	99.96	0.170561		2.23	79.7	92.9	7.13	14	10.6	19.8	48.6	3.61	304	0.2	10.4	2.38	0.14	11.4	470	6.61	15.7	30.5	3.73	14.2	2.65	1.07	2.33	0.33	1.62	0.29
TM08-42-1	Garnet amphibolite	94°25'48''	Bujiu	63	Zhang et al. (2019)	46.86	1.19	20.32	4.39766	6.49	10.4479	0.22	4.01	8.43	3.95	1.95	0.52	0.78	1.40234	99.74	0.677606		7.7776	151.4	151.6	16.71	13.3	3.08	17.08	62.1	5.316	675.36	0.2548	7.62	8.085	0.648	9.4	855.834	36.8381	57.771	112.8	13.7928	54.3533	10.6544	2.574	8.632	1.35765	6.5751	1.35608
T09-30-2	Granitic gneiss	94°20'54''	Bujiu	64	Zhang et al. (2019)	64.41	0.65	16.72	1.15	3.32	4.355	0.09	1.57	3.87	3.86	2.56	0.22	0.9	0.59	99.01	0.346386		3.7	146	67.3	7.57	9.27	20.7	22	107	8.67	341	0.46	14.4	24.7	1.82	36.1	398	12.3	75.1	133	13.8	43.9	6.57	1.29	4.27	0.54	2.73	0.52
T09-61-2	Granitic gneiss	94°27'06''	Bujiu	64	Zhang et al. (2019)	56.66	0.79	18.17	0.72	6.88	7.528	0.14	3.78	7.2	2.81	1.12	0.16	0.91	0.24	98.67	0.104651		2.13	80.9	229	22.2	24.8	28.3	19.8	34.1	3.01	196	0.22	9.4	1.87	0.7	51	407	16.6	11.4	23.6	3.02	12.1	2.84	1.09	3.15	0.49	3.11	0.67
T09-25-1	Granitic gneiss	94°15'12''	Bujiu	65	Zhang et al. (2019)	73.43	0.35	13.39	0.57	2.17	2.683	0.04	0.71	2.96	3.06	2.76	0.09	0.64	0.58	100.11	0.262673		4.82	174	33	8.01	4.7	20.2	16.7	79.6	9.65	747	0.56	13.3	10.6	0.99	32.6	354	13.5	37.9	70.6	8.1	28.7	4.96	1.3	3.86	0.51	2.82	0.58
T09-33-5	Granitic gneiss	94°26'12''	Bujiu	65	Zhang et al. (2019)	68.42	0.63	15.19	0.63	3.75	4.317	0.16	1.22	3.34	3.98	1.78	0.22	0.66	0.48	99.8	0.168		3.79	163	63.7	10.8	7.64	30.3	18.4	119	9.66	405	0.59	9.51	8.84	0.71	55.5	308	32	37.7	74.7	8.8	32.7	6.62	1.24	6.22	1.01	6.25	1.29
T10-120-1	Granitic gneiss	94°26'41''	Bujiu	75	Zhang et al. (2019)	67.12	0.55	16.38	1.47	2.05	3.373	0.05	1.6	3.64	4.26	1.94	0.25	0.46	0.35	103.493	0.717073		4.04	147	67.2	6.31	7.54	3.49	17.2	71.5	5.63	361	0.3	14.2	1.91	0.7	3.24	711	8.67	14.5	28.8	3.61	14.5	2.86	1.15	2.4	0.31	1.72	0.33
T10-94-10	Garnet amphibolite	93°53'23''	Zhaxi	78	Zhang et al. (2020)	51.75	0.92	19.36	3.7	4.69	8.02	0.13	4.79	8.72	3.83	0.3	0.3	0.98	0.56	108.05	0.788913		0.58	14.8	231	20.6	25.1	30	20.8	2.2	1.82	85	0.13	5.88	0.6	0.14	24.7	807	10.9	11.2	23	3.02	13.2	3.04	1.23	2.73	0.39	2.14	0.43
T16-88-11	Garnet amphibolite	94°20'57''	Airport	81	Zhang et al. (2021)	48.5	1.11	19.24	3.36	7.74	10.764	0.19	4.65	8.69	3.67	0.62	0.25	1.29	0.44	99.57	0.434109		2.32	88.5	281	25.3	32	15	22.7	4.3	3.57	124	0.15	4.16	0.33	0.15	8.73	620	26.3	6.9	18.4	3.04	15.6	4.39	1.45	4.84	0.75	4.72	0.97
TM08-38-4	Garnet amphibolite	94°19'36''	Airport	81	Zhang et al. (2022)	45.98	1.12	20.25	5.04208	6.63	11.1679	0.181	4.12	9.22	3.72	1.23	0.29	0.68	1.51792	99.301	0.760495		4.4168	61.8	202.5	23.17	27.78	3.94	22	21.4	1.923	178.395	0.13524	6.44	1.2348	0.144	11.7	580.846	23.3429	9.71303	21.16	3.276	15.0822	3.90495	1.255	4.003	0.756	4.1664	0.90405
T09-47-1	Granitic gneiss	93°49'24''	Zhaxi	82	Zhang et al. (2023)	66.95	0.32	15.64	1.37	1.28	2.513	0.08	1.04	3.39	4.44	2.87	0.13	1.81	1.67	99.18	1.07031		2.62	84.2	37.5	4.3	4.79	6	17.1	63.1	4.25	394	0.37	15.3	5.93	1.03	7.63	497	7.04	22.6	39.2	4.17	13.9	2.15	0.59	1.57	0.24	1.32	0.27
T10-94-4	Garnet amphibolite	93°53'23''	Zhaxi	82	Zhang et al. (2024)	52.44	0.82	19.42	4.62	3.75	7.908	0.14	4.55	8.55	3.87	0.63	0.23	0.4	0.63	107.958	1.232		1.09	37.1	241	23.2	24.9	22.8	20.7	7.67	2.35	183	0.16	6.01	0.8	0.24	22.6	720	14.1	10.9	23.9	3.18	13.9	3.39	1.1	3.05	0.44	2.69	0.55
TM08-17-1	Dioritic gneiss	94°02'49''	Zhaxi	82	Zhang et al. (2025)	58.71	0.68	16.73	3.18	3.28	6.142	0.111	3.76	6.21	4.27	1.19	0.23	0.54	1.04506	99.3961	0.969512		10.2134	137.1	154.3	20.21	23.99	30.49	20.03	18.6	1.325	269.22	0.09996	8.56	1.4112	0.469	49.5	416.598	20.0381	15.865	31.04	4.20315	17.3313	3.9417	0.954	3.286	0.60585	3.44715	0.702293
TM08-5-1	Dioritic gneiss	93°58'27''	Zhaxi	84	Zhang et al. (2026)	56.58	0.67	19.26	2.71	4.12	6.559	0.124	3.41	6.9	4.03	1.22	0.21	0.41	0.918556	100.153	0.657767		3.26848	58.9	136.2	17.3	22.8	18.74	19.67	24.6	3.577	283.08	0.25872	12.89	3.3712	0.833	28.7	479.514	16.981	16.6588	32.15	4.452	18.2248	3.9648	1.27	3.57	0.63105	3.2319	0.717728
TM08-11-2	Granitic gneiss	93°46'00''	Zhaxi	84	Zhang et al. (2027)	68.65	0.34	15.31	2.02	0.96	2.778	0.046	0.89	3.42	3.9	3.06	0.19	0.66	1.03685	99.8228	2.10417		6.46536	120.1	39.5	4.45	5.38	3.8	16.53	57.3	2.501	915.39	0.1274	13.11	4.8902	0.292	4.5	593.096	3.77143	14.2664	26.19	2.8896	10.3415	1.4658	0.539	1.09	0.15015	0.6825	0.12789
TM08-4-2	Dioritic gneiss	93°59'56''	Zhaxi	85	Zhang et al. (2028)	57.62	0.71	17.07	2.85	4.07	6.635	0.099	3.59	6.92	3.67	1.5	0.2	0.55	1.17299	99.472	0.700246		5.6049	94.7	161.5	17.92	31.13	27.31	19.58	53.3	3.89	293.58	0.29694	11.86	3.8612	1.269	50.3	475.104	15.2	16.5265	32.33	4.34595	17.2431	3.99105	1.12	3.279	0.58485	3.1479	0.695678
TM08-19-1	Dioritic gneiss	94°08'34''	Minlin	85	Zhang et al. (2029)	54.98	0.72	17.55	3.69	4.26	7.581	0.15	4.22	7.56	3.91	0.94	0.21	0.98	1.76414	99.9541	0.866197		5.84669	76.1	185.5	21.81	27.04	20.63	20.31	18.6	1.398	251.055	0.12936	11	2.2442	0.769	32.9	506.17	15.8286	10.4517	20.99	2.94105	12.8226	2.9694	0.905	2.934	0.50085	2.70795	0.567788
TM08-9-1	Dioritic gneiss	93°52'13''	Zhaxi	85	Zhang et al. (2030)	59.64	0.64	16.96	2.89	3.74	6.341	0.113	3.22	6.17	3.66	1.61	0.2	0.47	0.856262	99.6993	0.772727		5.14563	93.1	135.7	15.52	21.49	13.46	20.13	41.8	3.324	350.7	0.23324	12.33	1.2348	0.307	21.4	487.746	14.5714	13.66	26.85	3.66555	14.9835	3.045	1.032	2.676	0.47565	2.57775	0.584325
T09-39-3	Garnet amphibolite	93°53'33''	Zhaxi	85	Zhang et al. (2031)	50.18	0.99	17.69	3.99	4.9	8.491	0.15	5.26	8.54	3.26	1.46	0.26	2.64	2.16	98.84	0.814286		1.56	33.5	259	27.8	37.3	47.3	22.2	29.4	4.52	329	0.24	8.16	1.35	0.54	58.8	601	31.7	15.4	40.6	6.11	26.6	6.58	1.59	6.29	0.97	6.14	1.24
T16-76-36	Dioritic gneiss	94°05'51''	Milin	86	Zhang et al. (2032)	54.27	0.65	17.93	7.34	1.06	7.666	0.16	3.92	7.91	3.99	0.63	0.19	1.02	0.98	99.33	6.92453		1.96	71	191	19.6	25.3	16.6	20.3	8.47	3.16	198	0.15	7.54	0.98	0.29	28.7	575	20.9	11.3	26.1	3.62	16.3	3.81	1.16	3.77	0.58	3.72	0.76
T09-38-2	Dioritic gneiss	93°52'21''	Zhaxi	86	Zhang et al. (2033)	56.36	0.75	18.18	2.61	4.53	6.879	0.12	3.77	7.17	3.72	1.45	0.19	0.57	0.25	99.1	0.576159		1.49	48.9	215	18.3	27	42.4	20.7	38	2.61	317	0.21	10.6	2.06	0.52	57.4	601	12.4	11.2	22.9	2.97	12.5	2.78	0.89	2.86	0.42	2.47	0.53
TM08-8-4	Dioritic gneiss	93°54'38''	Zhaxi	86	Zhang et al. (2034)	55.32	0.68	18.52	3.9	3.9	7.41	0.141	3.82	7.06	4.6	1.26	0.23	0.44	0.78407	100.215	1		7.12613	119.3	156.9	17.64	24.31	20.66	22.3	22.3	3.643	331.17	0.22148	11.66	2.0188	0.474	30.6	619.36	17.2286	15.6445	32.3	4.71135	19.3599	4.1097	1.234	3.448	0.61635	3.2445	0.698985
T09-39-2	Dioritic gneiss	93°53'30''	Zhaxi	86	Zhang et al. (2035)	55.59	0.88	15.53	2.84	5.59	8.146	0.24	5.45	7.35	2.97	1.83	0.13	1.34	0.93	99.33	0.50805		1.18	31	171	34.6	35.3	46	19.2	65.6	4.98	144	0.26	7.31	1.02	0.4	156	358	18.1	11.6	24.4	3.3	14.4	3.85	0.71	3.78	0.63	3.95	0.76
TM07-42-2	Amphibolite	93°54'24''	Zhaxi	87	Zhang et al. (2036)	51.96	0.96	18.28	3.33787	5.41	8.41408	0.15	5.44	8.4	3.81	0.62	0.26	0.58	0.33	99.3379	0.616981		1.52	78	211	23.1	36.8	34	23.6	10.7	4.43	155	0.27	8.59	1.59	0.32	99.9	650	21.1	14.8	32.2	4.26	20.1	4.74	1.2	4.95	0.8	4.18	0.76
TM07-43-1	Dioritic gneiss	93°54'48''	Zhaxi	87	Zhang et al. (2037)	58.36	0.69	17.51	2.89487	3.64	6.24538	0.11	3.46	6.43	3.95	1.96	0.19	0.3	0.25	99.7149	0.795293		1.47	123	136	13.6	23.1	12	18.5	51	3.45	357	0.19	10.8	2.7	0.5	22.3	531	15.5	14.1	28.6	3.58	14.1	3.05	0.91	3.47	0.51	2.91	0.56
TM08-4-1	Dioritic gneiss	93°59'56''	Zhaxi	87	Zhang et al. (2038)	57.48	0.62	16.35	2.85	4.53	7.095	0.148	4.62	6.85	3.56	1.43	0.17	0.4	1.22419	99.8322	0.629139		5.70258	85.6	167	18.79	24.63	32.33	17.3	40.3	3.143	344.82	0.16562	8.9	2.0678	0.468	92.1	494.41	14.9429	15.0381	29.2	4.07505	17.5959	4.2	1.177	3.31	0.62265	3.22665	0.671423
TM08-8-3	Dioritic gneiss	93°54'35''	Zhaxi	87	Zhang et al. (2039)	55.22	0.75	17.88	3.3	4.57	7.54	0.131	4.03	7.33	3.87	1.33	0.25	0.48	0.778641	99.4396	0.722101		4.2684	88.2	182.5	19.26	24.84	17.59	19.62	37.2	3.675	282.555	0.24304	10.54	3.8024	1.099	30.6	528.906	14.2952	14.3987	27.5	3.62565	14.9615	3.24765	1.033	2.697	0.4809	2.55675	0.547943
TM08-10-1	Dioritic gneiss	93°50'18''	Zhaxi	87	Zhang et al. (2040)	55.62	0.65	18.03	3.03	4.6	7.327	0.137	3.76	7.11	3.83	1.33	0.19	0.76	1.35198	99.639	0.658696		4.93455	69.8	168.4	20.3	24.82	12.3	19.68	26.5	2.73	270.48	0.21462	11.23	1.9894	0.587	13.5	424.144	15.5905	12.8	25.21	3.4398	15.0381	3.05235	1.009	2.871	0.5292	2.66385	0.584325
T09-38-1	Dioritic gneiss	93°52'21''	Zhaxi	87	Zhang et al. (2041)	58.14	0.54	18.12	2.55	4.04	6.335	0.14	3.16	6.72	4	1.07	0.19	0.65	0.33	99	0.631188		1.18	36.4	158	13.3	22.1	30.1	19.8	21.5	2.27	234	0.16	10.7	2.29	0.63	41.5	600	12.3	12.1	25.1	3.19	12.7	2.76	0.88	2.56	0.38	2.36	0.47
T16-76-28	Garnet amphibolite	94°05'49''	Milin	88	Zhang et al. (2042)	49.38	1.15	16.48	5.29	7.96	12.721	0.27	5.3	6.66	3.01	1.38	0.14	1.71	1.31	99.16	0.664573		1.88	60.9	422	35.6	40.7	14.8	19.3	27.5	2.14	158	0.14	4.08	1.82	0.28	14.9	204	25.4	10.9	25.2	3.59	16.6	4.24	1.31	4.48	0.71	4.6	0.97
T16-77-1	Dioritic gneiss	94°05'59''	Milin	88	Zhang et al. (2043)	54.15	0.84	16.87	2.73	5.62	8.077	0.17	3.74	7.16	3.17	2.73	0.3	1.38	1.33	99.2	0.485765		3.64	133	230	20.2	25	17.8	19.4	45	7.78	470	0.32	10.1	1.33	0.17	29.4	599	23.4	24.7	51.3	6.64	27.5	5.87	1.44	5.08	0.73	4.25	0.88
T16-76-41	Garnet amphibolite	94°05'52''	Milin	88	Zhang et al. (2044)	51.4	0.82	18.69	3.67	5.41	8.713	0.14	4.3	8.22	4.17	0.7	0.25	1.18	1.06	99.12	0.678373		1.87	68	215	20	29.9	20.2	22.1	9.08	3.13	231	0.14	6.85	0.61	0.18	28.1	606	21.7	11.6	26.5	3.75	16.9	4.07	1.26	4.01	0.63	3.95	0.79
TM07-47-4	Grt amphibolite	94°07'00''	Minlin	88	Zhang et al. (2045)	48.39	1.02	21.25	4.06215	6.27	9.92593	0.17	3.59	7.5	4.12	1.65	0.44	1.14	0.97	100.072	0.647871		2	144	176	15.3	35.8	14	26.6	46	3.33	367	0.23	8.96	0.37	0.26	12	766	17.8	14.1	31.3	3.96	16.9	3.72	1.37	4.18	0.62	3.51	0.63
TM07-47-5	Garnet amphibolite	94°07'00''	Minlin	88	Zhang et al. (2046)	52.56	0.79	20.73	3.27807	4.33	7.28026	0.12	3.2	7.33	4.84	0.75	0.33	1.34	1.25	99.9881	0.75706		1.54	122	102	6.06	23.8	9.05	22.8	4.38	3.32	179	0.24	12.2	0.96	0.19	7.17	841	18.2	17	37.1	5.11	23	5.22	1.67	5.45	0.77	3.83	0.72
TM08-8-2	Dioritic gneiss	93°54'26''	Zhaxi	88	Zhang et al. (2047)	61.62	0.59	16.37	2.63	3.28	5.647	0.102	2.97	5.53	3.64	2.36	0.16	0.4	0.575064	99.8271	0.801829		6.76033	105.4	116.6	14.67	18.37	15.42	18.17	57.7	3.759	427.875	0.23226	13.96	1.4308	0.377	24.4	419.636	13.4571	13.3513	26.16	3.47655	14.1456	3.0975	0.917	2.605	0.4452	2.46645	0.525893
T16-77-5	Garnet amphibolite	94°06'00''	Milin	89	Zhang et al. (2048)	46.44	1.21	19.51	2.95	8.1	10.755	0.15	4.78	8.76	3.66	1.91	0.29	1.44	0.69	99.46	0.364198		2.19	79.3	275	21.3	32.1	12.2	22.7	44.4	4.23	289	0.16	6.55	2.29	0.33	5.64	576	23.2	14.3	31.4	4.31	19.4	4.92	1.55	4.94	0.74	4.5	0.86
TM07-43-8	Dioritic gneiss	93°54'51''	Zhaxi	89	Zhang et al. (2049)	58.57	0.64	17.3	2.83268	3.48	6.02941	0.12	3.65	6.24	3.87	1.53	0.17	0.58	0.57	99.4527	0.813987		2.59	115	147	18.5	18.9	18.9	18.4	34	2.84	407	0.22	11.2	1.63	0.48	33.4	454	15.1	11.6	25.5	3.13	12.8	2.92	0.86	2.67	0.41	2.43	0.49
TM08-6-1	Dioritic gneiss	93°54'48''	Zhaxi	89	Zhang et al. (2050)	56.44	0.59	17.44	2.9	4.48	7.09	0.132	3.87	7.26	3.71	1.22	0.26	0.45	1.19862	99.5006	0.647321		5.09652	85.1	152.7	16.73	22.67	19.25	19.69	31.4	2.369	291.9	0.15288	10.63	2.0286	0.562	41.2	607.306	14.9524	15.4571	29.83	4.1643	17.3092	3.7947	1.108	3.231	0.51975	2.84445	0.610785
TM08-7-1	Dioritic gneiss	93°54'45''	Zhaxi	89	Zhang et al. (2051)	54.06	0.65	18.94	3.35	4.65	7.665	0.139	4.22	7.71	4.23	0.8	0.25	0.28	0.577545	99.5765	0.72043		5.76653	109.6	172	21.32	27.46	22.34	22.52	10.9	3.859	226.17	0.27538	10.18	2.0188	0.536	36.2	610.736	16.2762	13.9356	28.63	3.9774	16.758	3.6813	1.109	3.237	0.57225	2.7867	0.605272
TM07-46-6	Garnet amphibolite	94°04'24''	Zhaxi	89	Zhang et al. (2052)	47.89	1.14	19.11	1.79472	10.29	11.9053	0.25	5.87	8.25	3.23	0.64	0.37	0.76	0.26	100.155	0.174414		1.92	142	178	28	30.7	8.27	21.4	15.4	5.04	157	0.33	5.66	0.89	0.33	6.31	1425	37.3	16.8	37.9	5.13	23.1	5.95	2.03	8.21	1.43	8.27	1.64
T09-39-1	Dioritic gneiss	93°53'30''	Zhaxi	90	Zhang et al. (2053)	60.34	0.56	17.21	2.46	3.56	5.774	0.12	2.71	5.66	4.15	2.38	0.18	0.55	0.59	99.92	0.691011		2.28	77.9	136	14.3	19.4	19.3	19.1	62.3	3.35	190	0.22	12.6	2.47	0.68	24	456	15.9	9.24	20.8	3.08	13.6	3.52	0.65	3.44	0.53	3.18	0.65
T16-76-1	Garnet amphibolite	94°05'38''	Milin	90	Zhang et al. (2054)	52.11	0.85	18.77	3.85	4.94	8.405	0.12	4.09	8.49	3.55	0.63	0.25	1.6	1.43	99.42	0.779352		1.99	71.6	215	19.9	27.6	16.6	21.9	5.66	4.06	184	0.35	8.46	1.05	0.2	25.3	634	24	11.5	26.7	3.9	17.6	4.23	1.24	4.25	0.68	4.27	0.89
TM07-43-4	Dioritic gneiss	93°54'49''	Zhaxi	90	Zhang et al. (2055)	62.73	0.47	15.93	2.7562	2.46	4.94058	0.1	2.8	5.24	3.87	1.48	0.14	1.22	1.25	99.4162	1.12041		0.86	66	104	9.86	15.8	8.92	17.6	34	2.19	319	0.28	9.37	1.09	0.26	16.8	487	11.3	10.4	20.2	2.61	10.3	2.42	0.82	2.74	0.41	2.42	0.48
T10-95-1	Dioritic gneiss	93°54'53''	Zhaxi	90	Zhang et al. (2056)	54.17	0.76	17.71	4.5	3.68	7.73	0.15	4.4	8.04	3.82	1.04	0.24	0.64	0.61	107.49	1.22283		2.24	77.8	221	25.5	23.4	21.4	18.9	19	3.19	188	0.25	8.39	4.83	1.17	34	578	15.3	14.2	30.6	4.02	17	3.75	1.18	3.28	0.46	2.81	0.59
T16-76-19	Garnet amphibolite	94°05'43''	Milin	90	Zhang et al. (2057)	49.4	0.93	19.79	3.99	6.2	9.791	0.19	3.82	8.34	4.01	0.73	0.32	1.12	0.86	99.1	0.643548		1.4	48.1	209	15.8	27.6	16	22	7.14	2.89	204	0.15	6.72	0.46	0.18	20.9	713	20.1	11.3	26.4	3.79	17.4	4.13	1.31	4.09	0.61	3.66	0.74
T16-76-13	Garnet amphibolite	94°05'41''	Milin	91	Zhang et al. (2058)	48.96	0.78	20.75	3.09	6.59	9.371	0.23	3.96	8.3	4.44	0.62	0.29	1.38	1.05	99.56	0.468892		1.72	37.5	192	16	26	12.6	21.5	5.38	2.56	143	0.12	6.46	0.27	0.09	7.82	789	19.3	8.33	19.9	2.95	13.9	3.59	1.21	3.66	0.57	3.5	0.72
T16-76-25	Garnet amphibolite	94°05'47''	Milin	91	Zhang et al. (2059)	53.77	0.75	17.97	3.17	4.87	7.723	0.13	4.27	8.01	4.07	0.55	0.2	1.75	1.13	99.77	0.650924		1.23	33.9	201	19.9	27.2	24.7	20.3	7.35	3.08	143	0.15	7.97	0.62	0.18	32.9	607	17.5	10	24	3.45	15.4	3.5	1.11	3.34	0.51	3.2	0.66
T16-76-11	Garnet amphibolite	94°05'39''	Milin	92	Zhang et al. (2060)	49.71	0.87	18.98	3.95	5.05	8.605	0.16	4.35	9.34	4.81	0.47	0.26	1.24	1.03	99.45	0.782178		1.7	58.2	213	16.2	32.1	23.6	20	7.58	3.29	107	0.16	9.21	0.18	0.12	7.33	743	18.3	8.61	21.5	3.3	16.1	4.1	1.34	3.89	0.58	3.45	0.68
T16-84-14	Dioritic gneiss	93°46'32''	Zhaxi	92	Zhang et al. (2061)	54.99	0.81	17.42	3.54	4.9	8.086	0.15	3.78	7.4	4.42	0.39	0.33	0.88	0.45	99.35	0.722449		2.24	87.4	200	17.3	21.4	19.7	23.2	1.09	5.19	210	0.18	4.8	0.26	0.07	61.2	870	15.4	16.9	38.3	5.31	22.8	4.67	1.29	3.9	0.53	2.92	0.56
T16-78-6	Garnet amphibolite	94°04'09''	Milin	93	Zhang et al. (2062)	45.75	1.28	17.31	3.41	7.31	10.379	0.17	7.37	9.74	3.22	1.47	0.28	1.27	0.88	98.84	0.466484		2.14	81.7	327	26.9	41.4	55.7	20.5	24.9	4.59	207	0.23	5.37	1.05	0.32	66.5	570	20.8	10.7	27.1	4.03	18.8	4.55	1.43	4.32	0.66	3.86	0.76
T16-76-2	Dioritic gneiss	94°05'46''	Milin	93	Zhang et al. (2063)	49.45	0.84	19.92	3.4	5.87	8.93	0.18	4.41	8.69	4.12	0.65	0.23	1.88	1.08	99.9	0.579216		1.94	70	203	14.6	26.6	21.9	21.3	7.64	3.18	214	0.2	8.57	0.43	0.09	32.9	701	18.6	8.45	22.2	3.5	16.7	4.14	1.29	3.87	0.57	3.34	0.67
T10-95-4	Dioritic gneiss	93°54'53''	Zhaxi	94	Zhang et al. (2064)	56.1	0.9	17.35	3.68	3.39	6.702	0.13	4.29	6.75	4.14	2.03	0.28	0.54	0.63	106.912	1.08555		3.61	150	196	22.5	22.5	43.8	20.7	47.2	6.65	377	0.39	7.99	2.3	0.57	83.3	609	18.5	19.6	41.9	5.15	21.1	4.62	1.35	3.93	0.54	3.16	0.63
T16-77-18	Garnet amphibolite	94°06'25''	Milin	96	Zhang et al. (2065)	49.43	0.8	19.27	3.52	6.13	9.298	0.26	4.85	8.47	4.04	0.98	0.32	1.09	0.58	99.42	0.574225		1.41	39.1	229	22.5	26.3	29.5	23.7	10	4.49	200	0.16	4.99	0.86	0.14	96.8	747	29.3	13.1	32.6	5.07	24.2	6.13	1.7	5.93	0.86	5.14	1.02
TM08-38-3	Dioritic gneiss	94°19'36''	Airport	104	Zhang et al. (2066)	53.84	0.95	17.21	2.93567	5.25	7.89211	0.137	5.19	7.07	3.23	1.88	0.33	0.7	1.43432	99.457	0.559176		7.67205	115.4	167.6	20.99	26.04	32.04	22.13	46.1	1.12	434.175	0.08624	6.1	1.2348	0.15	47.1	578.69	18.6952	16.8241	36.56	5.313	22.5907	4.956	1.437	4.284	0.69405	3.4062	0.69237
TM07-45-7	Dioritic gneiss	94°03'18''	Zhaxi	106	Zhang et al. (2067)	61.51	0.59	16.71	2.355	2.92	5.0395	0.11	3.03	5.94	3.7	1.61	0.22	0.64	0.77	99.725	0.806508		1.42	101	102	12.8	14.8	21	18.1	34	4.92	327	0.25	6.58	0.93	0.12	39.4	563	15.1	15	30.8	3.62	14.8	3.04	1.03	2.71	0.42	2.31	0.46
TM08-37-2	Granitic gneiss	94°20'06''	Airport	106	Zhang et al. (2068)	63.98	0.31	17.09	2.35629	1.91	4.03066	0.086	2.07	5.12	3.88	1.23	0.14	1.06	2.07371	100.246	1.23366		4.40558	87.5	75.4	8.39	8.23	5.61	17.59	28.5	2.847	327.705	0.22148	6.09	1.7934	0.677	15	467.656	11.1714	10.6943	19.6	2.65965	10.1546	2.16825	0.794	1.894	0.34755	1.84275	0.393593
T16-88-1	Granitic gneiss	94°20'47''	Airport	108	Zhang et al. (2069)	64.09	0.51	16.59	1.66	2.89	4.384	0.14	2.06	5.32	4.17	0.99	0.21	1.03	0.63	99.83	0.574394		1.64	61.2	92.9	9.71	12.3	11.7	17.9	25.4	3.97	342	0.16	5.89	3.89	0.1	19	751	13.6	14.3	27.1	3.28	13	2.45	0.81	2.26	0.34	2.18	0.5
TM08-37-10	Amphibolite	94°20'06''	Airport	109	Zhang et al. (2070)	51.48	0.73	16.36	2.13545	6.42	8.34191	0.131	7.37	8.65	3.72	0.35	0.17	0.71	2.07455	99.591	0.332625		3.34794	54.3	227.7	31.2	31.83	51.24	16.96	4.5	1.715	74.97	0.19796	2.27	1.911	0.339	198.9	352.898	14.2571	5.72198	12.27	1.7787	8.3391	2.373	0.815	2.561	0.4935	2.65335	0.56889
TM08-18-3	Amphibolite	94°04'26''	Zhaxi	110	Zhang et al. (2071)	50.8	0.48	19.12	3.86	5.1	8.574	0.193	5.03	9.44	3.52	0.21	0.37	0.75	1.46763	99.5906	0.756863		1.18425	22.5	158	19.12	25.34	26.3	21.2	2.8	0.453	108.885	0.06272	4.58	0.5782	0.172	38.3	688.156	12.5619	11.5322	21.79	3.02715	12.6021	2.6901	1.093	2.576	0.4116	2.1252	0.443205
TM08-39-1	Garnet amphibolite	94°19'30''	Airport	113	Zhang et al. (2072)	51.3	0.81	20.06	3.60994	6.2	9.44895	0.246	3.89	8.12	3.88	0.35	0.38	0.65	1.36006	100.206	0.582248		1.06422	24.6	126.5	17.9	14.09	7.82	22.4	1.4	0.483	112.035	0.04802	7.24	0.4802	0.374	18.9	703.934	19.4762	11.4109	22.34	3.2529	14.7073	3.4713	1.327	3.344	0.609	3.255	0.778365
TM08-20-1	Dioritic gneiss	94°15'36''	Airport	142	Zhang et al. (2073)	54.62	0.74	17.3	5.98	2.61	7.992	0.154	4.32	7.4	3.79	1.19	0.33	0.6	1.10049	99.5345	2.29119		6.12095	84.8	178	20.03	25.61	23.84	21.33	24.1	0.971	371.385	0.05978	5.98	2.2932	0.153	44.7	574.672	18.9143	20.6719	38.84	5.12925	20.7827	4.37745	1.302	3.776	0.6027	3.40305	0.678038
TM08-20-4	Granitic gneiss	94°15'36''	Airport	163	Zhang et al. (2074)	69.89	0.18	16.18	0.96	1.44	2.304	0.074	0.86	4.36	4.46	0.5	0.08	0.56	0.920272	99.9043	0.666667		2.06934	47.5	35.9	4.35	4.04	3.2	15.19	7	0.209	605.22	0.03234	7.21	0.1274	0.186	7.8	593.88	4.42857	2.37038	4.36	0.60795	2.7321	0.68565	0.316	0.664	0.12075	0.7434	0.142223
[truncated: 7 more columns]
